# Supplementary material
Source: ML conference proceedings conference paper supplement (https://proceedings.neurips.cc/paper_files/paper/2019/hash/ae2a2db40a12ec0131d48acc1218d2ef-Abstract.html)
Supplement: Supplementary file [file ae2a2db40a12ec0131d48acc1218d2ef-Supplemental.zip]

## 5 Supplementary Material

### 5.1 Auxiliary Lemmas

The next lemma shows smoothness properties of the softmax function.

**Lemma 2.** Let  $h_i(\mathbf{x}) = \frac{e^{-x_i}}{\sum_{j=1}^K e^{-x_j}}$  and  $h(\mathbf{x}) = (h_1(\mathbf{x}), \dots, h_K(\mathbf{x}))$ . Then for any  $\mathbf{x} \in \mathbb{R}^K$  and  $\Delta \in \mathbb{R}_+^K$

$$\|h(\mathbf{x}) - h(\mathbf{x} + \Delta)\|_1 \leq 2 \langle h(\mathbf{x}), \Delta \rangle. \quad (29)$$

*Proof.* For all  $\mathbf{x} \in \mathbb{R}^K$  and  $\Delta \in \mathbb{R}_+^K$

$$\begin{aligned} h_i(\mathbf{x} + \Delta) - h_i(\mathbf{x}) &= \frac{e^{-x_i - \Delta_i}}{\sum_{j=1}^K e^{-x_j - \Delta_j}} - \frac{e^{-x_i}}{\sum_{j=1}^K e^{-x_j}} \stackrel{(a)}{\geq} \\ &\quad \frac{e^{-x_i - \Delta_i} - e^{-x_i}}{\sum_{j=1}^K e^{-x_j}} = (e^{-\Delta_i} - 1) h_i(\mathbf{x}) \stackrel{(b)}{\geq} -\Delta_i h_i(\mathbf{x}) \end{aligned} \quad (30)$$

where (a) follows since  $\sum_{j=1}^K e^{-x_j - \Delta_j} \leq \sum_{j=1}^K e^{-x_j}$  and (b) since  $1 - x \leq e^{-x}$  for all  $x \geq 0$ .

We also have for all  $\mathbf{x} \in \mathbb{R}^K$  and  $\Delta \in \mathbb{R}_+^K$  that

$$\begin{aligned} h_i(\mathbf{x} + \Delta) - h_i(\mathbf{x}) &= \frac{e^{-x_i - \Delta_i}}{\sum_{j=1}^K e^{-x_j - \Delta_j}} - \frac{e^{-x_i}}{\sum_{j=1}^K e^{-x_j}} \stackrel{(a)}{\leq} \\ &\quad \frac{e^{-x_i - \Delta_i}}{\sum_{j=1}^K e^{-x_j - \Delta_j}} - \frac{e^{-x_i - \Delta_i}}{\sum_{j=1}^K e^{-x_j}} = h_i(\mathbf{x} + \Delta) \left( 1 - \frac{\sum_{j=1}^K e^{-x_j - \Delta_j}}{\sum_{l=1}^K e^{-x_l}} \right) = \\ &\quad h_i(\mathbf{x} + \Delta) \frac{\sum_{j=1}^K e^{-x_j} (1 - e^{-\Delta_j})}{\sum_{l=1}^K e^{-x_l}} \stackrel{(b)}{\leq} h_i(\mathbf{x} + \Delta) \frac{\sum_{j=1}^K \Delta_j e^{-x_j}}{\sum_{l=1}^K e^{-x_l}} \end{aligned} \quad (31)$$

where (a) follows since  $e^{-x_j} \geq e^{-x_j - \Delta_j}$  and (b) since  $1 - x \leq e^{-x}$  for all  $x \geq 0$ . Combining the two inequalities we conclude that

$$\begin{aligned} \|h(\mathbf{x}) - h(\mathbf{x} + \Delta)\|_1 &= \sum_{i=1}^K |h_i(\mathbf{x}) - h_i(\mathbf{x} + \Delta)| \stackrel{(a)}{\leq} \\ &\quad \sum_{i=1}^K \Delta_i h_i(\mathbf{x}) + \sum_{i=1}^K h_i(\mathbf{x} + \Delta) \left( \sum_{j=1}^K \frac{\Delta_j e^{-x_j}}{\sum_{l=1}^K e^{-x_l}} \right) = \\ &\quad \langle h(\mathbf{x}), \Delta \rangle + \left( \sum_{j=1}^K \left( \Delta_j \frac{e^{-x_j}}{\sum_{l=1}^K e^{-x_l}} \right) \right) \sum_{i=1}^K h_i(\mathbf{x} + \Delta) \stackrel{(b)}{=} 2 \langle h(\mathbf{x}), \Delta \rangle \end{aligned} \quad (32)$$

where (a) follows since (30) and (31) show that for all  $i$

$$|h_i(\mathbf{x} + \Delta) - h_i(\mathbf{x})| \leq \max \left\{ \Delta_i h_i(\mathbf{x}), h_i(\mathbf{x} + \Delta) \frac{\sum_{j=1}^K \Delta_j e^{-x_j}}{\sum_{j=1}^K e^{-x_j}} \right\} \quad (33)$$

and (b) follows since  $\sum_{i=1}^K h_i(\mathbf{x} + \Delta) = 1$  by definition.  $\square$

The next lemma analyzes the contribution of the “no-delay” term to the expected regret.

**Lemma 3.** Let  $\eta_t$  be a non-increasing a sequence of step sizes. Let  $\{l_t^{(i)}\}$  be a cost sequence such that  $l_t^{(i)} \in [0, 1]$  for every  $t, i$ . Let  $\{d_t\}$  be a delay sequence such that the reward from round  $t$  is received at round  $t + d_t$ . Let  $\mathcal{S}_t$  be the set of costs (feedback samples) received at round  $t$ . Then

$$E^{\mathbf{a}} \left\{ \sum_{t=1}^T \sum_{s \in \mathcal{S}_t} \eta_s \langle l_s, \mathbf{p}_{s-} \rangle - \min_i \sum_{t=1}^T \eta_t l_t^{(i)} \right\} \leq \ln K + \frac{K}{2} \sum_{t=1}^T \eta_t^2. \quad (34)$$

*Proof.* Define  $s_-, s_+$  as the steps a moment before and after using the feedback from round  $s$ , respectively. These steps are taking place in round  $t$  if  $s \in \mathcal{S}_t$ , and  $\mathbf{p}_{s_-}$  is the computed probability vector at  $s_-$ . Define  $\Phi(t) = -\ln\left(\sum_{i=1}^K e^{-\tilde{L}_t^{(i)}}\right)$  and  $\tilde{l}_t = \left(0, \dots, \frac{l_t^{(a_t)}}{p_t^{(a_t)}}, \dots, 0\right)$ . We have

$$\begin{aligned} \Phi(s_+) - \Phi(s_-) &= -\ln\left(\frac{\sum_{i=1}^K e^{-\tilde{L}_{s_-}^{(i)}} e^{-\eta_s \tilde{l}_s^{(i)}}}{\sum_{j=1}^K e^{-\tilde{L}_{s_-}^{(j)}}}\right) = -\ln\left(\sum_{i=1}^K p_{s_-}^{(i)} e^{-\eta_s \tilde{l}_s^{(i)}}\right) \stackrel{(a)}{\geq} \\ &\quad -\ln\left(\sum_{i=1}^K p_{s_-}^{(i)} \left(1 - \eta_s \tilde{l}_s^{(i)} + \frac{1}{2} \eta_s^2 \left(\tilde{l}_s^{(i)}\right)^2\right)\right) = \\ &\quad -\ln\left(1 - \sum_{i=1}^K p_{s_-}^{(i)} \left(\eta_s \tilde{l}_s^{(i)} - \frac{1}{2} \eta_s^2 \left(\tilde{l}_s^{(i)}\right)^2\right)\right) \stackrel{(b)}{\geq} \eta_s \sum_{i=1}^K p_{s_-}^{(i)} \tilde{l}_s^{(i)} - \frac{\eta_s^2}{2} \sum_{i=1}^K p_{s_-}^{(i)} \left(\tilde{l}_s^{(i)}\right)^2 \end{aligned} \quad (35)$$

where (a) follows since  $e^{-x} \leq 1 - x + \frac{1}{2}x^2$  and (b) since  $\ln(1 - x) \leq -x$ . Taking the expectation on both sides of (35) yields

$$\begin{aligned} E^{\mathbf{a}} \{\Phi(s_+) - \Phi(s_-)\} &\geq E^{\mathbf{a}} \left\{ \eta_s \sum_{i=1}^K p_{s_-}^{(i)} \tilde{l}_s^{(i)} - \frac{\eta_s^2}{2} \sum_{i=1}^K p_{s_-}^{(i)} \left(\tilde{l}_s^{(i)}\right)^2 \right\} \stackrel{(a)}{=} \\ &\quad E^{\mathbf{a}} \left\{ \eta_s \sum_{i=1}^K p_{s_-}^{(i)} E^{\mathbf{a}} \left\{ \tilde{l}_s^{(i)} \mid \mathcal{F}_{s_-} \right\} \right\} - \frac{\eta_s^2}{2} E^{\mathbf{a}} \left\{ \sum_{i=1}^K p_{s_-}^{(i)} E^{\mathbf{a}} \left\{ \left(\tilde{l}_s^{(i)}\right)^2 \mid \mathcal{F}_{s_-} \right\} \right\} \stackrel{(b)}{=} \\ &\quad E^{\mathbf{a}} \left\{ \eta_s \langle \mathbf{l}_s, \mathbf{p}_{s_-} \rangle \right\} - \frac{\eta_s^2}{2} \sum_{i=1}^K \left( l_s^{(i)} \right)^2 \geq E^{\mathbf{a}} \left\{ \eta_s \langle \mathbf{l}_s, \mathbf{p}_{s_-} \rangle \right\} - \frac{\eta_s^2}{2} K \end{aligned} \quad (36)$$

where (a) uses  $p_{s_-}^{(i)} \in \mathcal{F}_{s_-}$  and (b) uses  $p_{s_-}^{(i)} \in \mathcal{F}_{s_-}$  (since  $s < s_-$ ) together with the fact that  $\tilde{l}_s^{(i)}$  is  $\frac{l_s^{(i)}}{p_{s_-}^{(i)}}$  with probability  $p_{s_-}^{(i)}$  and zero otherwise. Note that  $a_s$  is independent of  $\mathcal{F}_{s_-}$  since by definition the feedback from  $a_s$  was not received until round  $s_-$ . Hence, by iterating (36) over  $s$  we obtain

$$\begin{aligned} E^{\mathbf{a}} \{\Phi(s_T^+) - \Phi(1)\} &= E^{\mathbf{a}} \left\{ \sum_{t=1}^T \sum_{s \in \mathcal{S}_t} (\Phi(s_+) - \Phi(s_-)) \right\} \geq \\ &\quad E^{\mathbf{a}} \left\{ \sum_{t=1}^T \sum_{s \in \mathcal{S}_t} \eta_s \langle \mathbf{l}_s, \mathbf{p}_{s_-} \rangle \right\} - \frac{K}{2} \sum_{t=1}^T \eta_t^2. \end{aligned} \quad (37)$$

where  $s_T \in \mathcal{S}_T$  is the last feedback to be updated at round  $T$ . Now we upper bound  $\Phi(s_T^+) - \Phi(1)$ . We have for every  $i$

$$\begin{aligned} E^{\mathbf{a}} \{\Phi(s_T^+) - \Phi(1)\} &= -E^{\mathbf{a}} \left\{ \ln \left( \sum_{j=1}^K e^{-\tilde{L}_{s_T^+}^{(j)}} \right) - \ln K \right\} \stackrel{(a)}{\leq} \\ &\quad E^{\mathbf{a}} \left\{ \tilde{L}_{s_T^+}^{(i)} + \ln K \right\} \stackrel{(b)}{\leq} \sum_{t=1}^T \eta_t l_t^{(i)} + \ln K \end{aligned} \quad (38)$$

where (a) follows by omitting positive terms from  $\sum_{i=1}^K e^{-\tilde{L}_t^{(i)}}$  and (b) since we are adding  $\eta_t l_t^{(i)}$  (positive) terms of rounds whose feedback was not received before round  $T$ . Combining (37) and (38), we obtain for all  $i = 1, \dots, K$

$$E^{\mathbf{a}} \left\{ \sum_{t=1}^T \sum_{s \in \mathcal{S}_t} \eta_s \langle \mathbf{l}_s, \mathbf{p}_{s_-} \rangle - \sum_{t=1}^T \eta_t l_t^{(i)} \right\} \leq \ln K + \frac{K}{2} \sum_{t=1}^T \eta_t^2. \quad (39)$$

□

The next lemma is necessary to analyze the contribution of the “delay term” to the expected regret.

**Lemma 4.** *Let  $\{\eta_t\}$  be a non-increasing positive sequence. Let  $d_t$  be the delay of the cost of the action at round  $t$ . Let  $\mathcal{S}_r$  be the set of feedback samples received at round  $t$ , and define  $\mathcal{S}_{t,s} = \{r \in \mathcal{S}_t; r < s\}$ , which is the set of feedback samples that the algorithm uses before the feedback from round  $s$  is used. Define the set  $\mathcal{M}$  of all samples that have not been received by round  $T$ . Then*

$$\sum_{t=1}^T \sum_{s \in \mathcal{S}_t} \eta_s \left( \sum_{q \in \mathcal{S}_{t,s}} \eta_q + \sum_{r=s}^{t-1} \sum_{q \in \mathcal{S}_r} \eta_q \right) \leq 2 \sum_{t \notin \mathcal{M}} \eta_t^2 d_t. \quad (40)$$

*Proof.* The quantity  $Q_{s,t} \triangleq \sum_{q \in \mathcal{S}_{t,s}} \eta_q + \sum_{r=s}^{t-1} \sum_{q \in \mathcal{S}_r} \eta_q$  is a weighted count of the number of feedback samples received and used between round  $s$  and round  $t$ , before the feedback from round  $s$  is used. We want to upper bound  $\sum_{t=1}^T \sum_{s \in \mathcal{S}_t} \eta_s Q_{s,t}$  for all possible delay sequences  $\{d_t\}$ . We do so by (over) counting the number of appearances of each feedback from the  $T$  feedback samples, in the different  $Q_{s,t}$  “buckets”. There are two possible cases of feedback samples being counted, so we write  $Q_{s,t} = Q_{s,t}^1 + Q_{s,t}^2$ .

- A feedback from  $q \geq s$  is received and used before  $s$  is used: there are a maximum of  $d_s$  feedback samples of this type that can each contribute  $\eta_q \leq \eta_s$  with  $q \geq s$  to  $Q_{s,t}^1$  for  $s \in \mathcal{S}_t$  (since  $\eta_t$  is non-increasing). We over count them by giving each  $Q_{s,t}^1$  term all of its  $d_s$  possible samples of this type. So

$$\sum_{t=1}^T \sum_{s \in \mathcal{S}_t} \eta_s Q_{s,t}^1 \leq \sum_{t=1}^T \sum_{s \in \mathcal{S}_t} \eta_s^2 d_s = \sum_{t \notin \mathcal{M}} \eta_t^2 d_t. \quad (41)$$

- A feedback from  $q < s$  is received and used before  $s$  is used: the samples from round  $q$  can contribute to a maximum of  $d_q$  different  $Q_{s,t}^2$  terms, all with  $s \geq q$ . This follows simply because the feedback from  $q$  is not received before  $q + d_q$ . Denote by  $\Gamma_q$  the set of rounds  $s$  such that the samples from round  $q$  contribute to  $Q_{s,t}^2$ . Then

$$\sum_{t=1}^T \sum_{s \in \mathcal{S}_t} \eta_s Q_{s,t}^2 \stackrel{(a)}{=} \sum_{q \notin \mathcal{M}} \sum_{s \in \Gamma_q} \eta_s \eta_q \stackrel{(b)}{\leq} \sum_{q \notin \mathcal{M}} \eta_q^2 |\Gamma_q| \leq \sum_{q \notin \mathcal{M}} \eta_q^2 d_q \quad (42)$$

where (a) follows since only rounds  $q$  whose feedback is received sometime before  $T$  are counted in  $Q_{s,t}^2$  for some  $s, t$ . Inequality (b) uses  $\eta_s^2 \leq \eta_q^2$  since  $\eta_t$  is non-increasing and  $s \geq q$  for all  $s \in \Gamma_q$ .

Adding (41) and (42) we obtain (40).  $\square$

## 5.2 Proof of Theorem 2

*Proof.* Define  $\mathcal{M}_e$  as the set of feedback samples for costs in epoch  $e$  that are not received within epoch  $e$ . Denote by  $T_e = \max \mathcal{T}_e$  the last round in  $\mathcal{T}_e$ . Note that  $\mathcal{T}_e$  is the set of consecutive rounds from  $T_{e-1} + 1$  to  $T_e$ . Every round  $t \in \mathcal{T}_e$  such that  $t \notin \mathcal{M}_e$  contributes exactly  $d_t$  to  $\sum_{\tau=T_{e-1}+1}^{T_e} m_\tau$ , since the  $t$ -th feedback is missing for  $d_t$  rounds some time between  $T_{e-1} + 1$  and  $T_e$ . Therefore

$$\sum_{t \in \mathcal{T}_e, t \notin \mathcal{M}_e} d_t \leq \sum_{\tau=T_{e-1}+1}^{T_e} m_\tau \stackrel{(a)}{\leq} 2^{e-1} \quad (43)$$

where (a) uses that if  $\sum_{\tau=T_{e-1}+1}^{T_e} m_\tau > 2^{e-1}$  then  $\sum_{\tau=1}^{T_e} m_\tau \geq 2^{e-1} + 2^{e-1} = 2^e$  so epoch  $e + 1$  should have been already started. We apply Theorem 1 separately on every epoch, which yields

$$R_e \triangleq E^a \left\{ \sum_{t \in \mathcal{T}_e} l_t^{(a_t)} - \min_i \sum_{t \in \mathcal{T}_e} l_t^{(i)} \right\} \leq \frac{\ln K}{\eta_e} + \eta_e \left( \frac{K}{2} |\mathcal{T}_e| + 4 \sum_{t \in \mathcal{T}_e, t \notin \mathcal{M}_e} d_t \right) + |\mathcal{M}_e|. \quad (44)$$

Now we want to find the maximal  $|\mathcal{M}_e|$  such that  $\sum_{\tau=T_{e-1}+1}^{T_e} m_\tau \leq 2^{e-1}$  is still possible. The “cheapest” way to increase  $|\mathcal{M}_e|$  is when the feedback from round  $T_e$  is delayed by one (contributes 1 to  $\sum_{\tau=T_{e-1}+1}^{T_e} m_\tau$ ), the feedback from round  $T_e - 1$  is delayed by two (contributes 2 to  $\sum_{\tau=T_{e-1}+1}^{T_e} m_\tau$ ) and so on, which gives

$$\sum_{i=1}^{|\mathcal{M}_e|} i = \frac{|\mathcal{M}_e|(|\mathcal{M}_e| + 1)}{2} \leq 2^{e-1} \implies |\mathcal{M}_e| \leq 2^{\frac{e}{2}} \quad (45)$$

so by choosing  $\eta_e = \sqrt{\frac{\ln K}{2^e}}$  we obtain

$$R_e \leq \sqrt{\ln K} \left( 2^{\frac{e}{2}} + 2^{-\frac{e}{2}} \left( \frac{K}{2} |\mathcal{T}_e| + 4 \sum_{t \in \mathcal{T}_e, t \notin \mathcal{M}_e} d_t \right) \right) + 2^{\frac{e}{2}} \stackrel{(a)}{\leq} 3 \cdot 2^{\frac{e}{2}} \sqrt{\ln K} + 2^{-\frac{e}{2}-1} |\mathcal{T}_e| K \sqrt{\ln K} + 2^{\frac{e}{2}} \quad (46)$$

where (a) follows from (43). Denote the last epoch by  $E$ . Hence, we conclude that

$$\begin{aligned} E^a \{R(T)\} &= \sum_{e=1}^E R_e \leq \left( 3\sqrt{\ln K} + 1 \right) \sum_{e=1}^E 2^{\frac{e}{2}} + \frac{K}{2} \sqrt{\ln K} \sum_{e=1}^E |\mathcal{T}_e| 2^{-\frac{e}{2}} \leq \\ &\quad \sqrt{2} \left( 3\sqrt{\ln K} + 1 \right) \frac{2^{\frac{E}{2}} - 1}{\sqrt{2} - 1} + \frac{K}{2} \sqrt{\ln K} \sum_{e=1}^E |\mathcal{T}_e| 2^{-\frac{e}{2}} \stackrel{(a)}{\leq} \\ &\quad 15 \left( \sqrt{\ln K} + 1 \right) \sqrt{\sum_{t=1}^T d_t + \frac{5}{2} K \sqrt{T \ln K}} = O \left( \sqrt{\ln K \left( K^2 T + \sum_{t=1}^T d_t \right)} \right) \end{aligned} \quad (47)$$

where in (a) we used that

$$\sum_{t=1}^T d_t \geq \sum_{t=1}^T \min \{d_t, T - t + 1\} = \sum_{t=1}^T m_t \geq \sum_{t=1}^{T_E} m_t \geq 2^{E-1} \quad (48)$$

and also that  $\sum_{e=1}^E |\mathcal{T}_e| 2^{-\frac{e}{2}}$  subject to  $\sum_{e=1}^E |\mathcal{T}_e| = T$  is maximized when there are only  $\lceil \log_2 T \rceil$  epochs with length  $2^e$  to epoch  $e$  (maximal length possible), so

$$\sum_{e=1}^E |\mathcal{T}_e| 2^{-\frac{e}{2}} \leq \sum_{e=1}^{\lceil \log_2 T \rceil} 2^{\frac{e}{2}} \leq \sqrt{2} \frac{2^{\frac{\lceil \log_2 T \rceil}{2}} - 1}{\sqrt{2} - 1} \leq 5\sqrt{T} \quad (49)$$

□

### 5.3 Proof of Theorem 3

*Proof.* We need to show that  $(\bar{\mathbf{p}}_T, \bar{\mathbf{q}}_T)$  converges in  $L^1$  to the set of NE of the game as  $T \rightarrow \infty$ . Let  $\varepsilon > 0$ . Define the ergodic average of the value of the game by

$$\bar{U}_T = \frac{\sum_{t=1}^T \eta_t U(\mathbf{p}_t, \mathbf{q}_t)}{\sum_{t=1}^T \eta_t}. \quad (50)$$

By using EXP3 with cost sequence  $l_{r,t}^{(i)} = U(i, \mathbf{q}_t)$  we know from Lemma 1 that the row player guarantees that for any column strategy, in particular  $\mathbf{q}_t$ , and any row strategy  $\mathbf{p}$ , possibly random, we have

$$E^a \left\{ \sum_{t=1}^T \eta_t (U(\mathbf{p}_t, \mathbf{q}_t) - U(\mathbf{p}, \mathbf{q}_t)) \right\} \leq \ln K + \frac{K}{2} \sum_{t=1}^T \eta_t^2 + 4 \sum_{t=1}^T \eta_t^2 d_t^r + \sum_{t \in \mathcal{M}^r} \eta_t \quad (51)$$

where the set of missing samples is  $\mathcal{M}^r = \{t \mid t + d_t^r > T\}$ . Define  $t^*(T) = \min \mathcal{M}^r$ , and note that  $t^*(T) \rightarrow \infty$  as  $T \rightarrow \infty$  since  $t + d_t^r \geq t$ , and  $f(t) = t$  is increasing. Since  $\eta_t$  is non-increasing then

$$\sum_{t \in \mathcal{M}^r} \eta_t \leq |\mathcal{M}^r| \eta_{t^*(T)} \leq (T - t^*(T) + 1) \eta_{t^*(T)} \leq d_{t^*(T)}^r \eta_{t^*(T)}. \quad (52)$$

Therefore there exists a  $T_1 > 0$  such that for all  $T > T_1$

$$\begin{aligned} E^a \{ \bar{U}_T - U(\mathbf{p}, \bar{\mathbf{q}}_T) \} &= E^a \left\{ \frac{\sum_{t=1}^T \eta_t (U(\mathbf{p}_t, \mathbf{q}_t) - U(\mathbf{p}, \mathbf{q}_t))}{\sum_{t=1}^T \eta_t} \right\} \stackrel{(a)}{\leq} \\ &\frac{d_{t^*(T)}^r \eta_{t^*(T)} + \ln K + \frac{K}{2} \sum_{t=1}^T \eta_t^2 + 4 \sum_{t=1}^T \eta_t^2 d_t^r}{\sum_{t=1}^T \eta_t} \stackrel{(b)}{\leq} \frac{\varepsilon}{2} \end{aligned} \quad (53)$$

where (a) is (51) and (b) follows since  $d_t^r \eta_t \rightarrow 0$  as  $t \rightarrow \infty$ ,  $\sum_{t=1}^\infty \eta_t = \infty$  and  $\sum_{t=1}^\infty d_t^r \eta_t^2 < \infty$ . By also using EXP3 with cost sequence  $l_{c,t}^{(j)} = 1 - U(\mathbf{p}_t, j)$ , we know from Lemma 1 that the column player guarantees that for any row strategy, in particular  $\mathbf{p}_t$  and any column strategy  $\mathbf{q}$ , possibly random, we have

$$E^a \left\{ \sum_{t=1}^T \eta_t (U(\mathbf{p}_t, \mathbf{q}) - U(\mathbf{p}_t, \mathbf{q}_t)) \right\} \leq \ln K + \frac{K}{2} \sum_{t=1}^T \eta_t^2 + 4 \sum_{t=1}^T \eta_t^2 d_t^c + \sum_{t \in \mathcal{M}^c} \eta_t. \quad (54)$$

Therefore there exists a  $T_2 > 0$  such that for all  $T > T_2$

$$\begin{aligned} E^a \{ U(\bar{\mathbf{p}}_T, \mathbf{q}) - \bar{U}_T \} &= \frac{E^a \left\{ \sum_{t=1}^T \eta_t (U(\mathbf{p}_t, \mathbf{q}) - U(\mathbf{p}_t, \mathbf{q}_t)) \right\}}{\sum_{t=1}^T \eta_t} \stackrel{(a)}{\leq} \\ &\frac{d_{t^*(T)}^c \eta_{t^*(T)} + \ln K + \frac{K}{2} \sum_{t=1}^T \eta_t^2 + 4 \sum_{t=1}^T \eta_t^2 d_t^c}{\sum_{t=1}^T \eta_t} \stackrel{(b)}{\leq} \frac{\varepsilon}{2} \end{aligned} \quad (55)$$

where (a) is (54) and (b) follows since  $d_t^c \eta_t \rightarrow 0$  as  $t \rightarrow \infty$ ,  $\sum_{t=1}^\infty \eta_t = \infty$  and  $\sum_{t=1}^\infty d_t^c \eta_t^2 < \infty$ .

Now, define  $\mathbf{p}_T^b$  as the best-response to  $\bar{\mathbf{q}}_T$ , which is a random vector that is a function of the random vector  $\bar{\mathbf{q}}_T$

$$\mathbf{p}_T^b = \arg \min_{\mathbf{p}'} U(\mathbf{p}', \bar{\mathbf{q}}_T) \quad (56)$$

together with  $\mathbf{q}_T^b$ , the best-response to  $\bar{\mathbf{p}}_T$ , which is a random vector that is a function of the random vector  $\bar{\mathbf{p}}_T$ :

$$\mathbf{q}_T^b = \arg \max_{\mathbf{q}'} U(\bar{\mathbf{p}}_T, \mathbf{q}'). \quad (57)$$

Hence, by choosing  $\mathbf{p} = \mathbf{p}_T^b$ ,  $\mathbf{q} = \bar{\mathbf{q}}_T$  in (53) and (55) and adding them together we conclude that for all  $T > \max \{T_1, T_2\}$

$$E^a \left\{ \left| U(\bar{\mathbf{p}}_T, \bar{\mathbf{q}}_T) - \min_{\mathbf{p}'} U(\mathbf{p}', \bar{\mathbf{q}}_T) \right| \right\} \stackrel{(a)}{=} E^a \{ \bar{U}_T - U(\mathbf{p}_T^b, \bar{\mathbf{q}}_T) \} + E^a \{ U(\bar{\mathbf{p}}_T, \bar{\mathbf{q}}_T) - \bar{U}_T \} \leq \varepsilon \quad (58)$$

where (a) follows since  $U(\bar{\mathbf{p}}_T, \bar{\mathbf{q}}_T) \geq U(\mathbf{p}_T^b, \bar{\mathbf{q}}_T)$ . By choosing instead  $\mathbf{p} = \bar{\mathbf{p}}_T$ ,  $\mathbf{q} = \mathbf{q}_T^b$  in (53) and (55) and adding them together we conclude that for all  $T > \max \{T_1, T_2\}$

$$E^a \left\{ \left| U(\bar{\mathbf{p}}_T, \bar{\mathbf{q}}_T) - \max_{\mathbf{q}'} U(\bar{\mathbf{p}}_T, \mathbf{q}') \right| \right\} \stackrel{(a)}{=} E^a \{ \bar{U}_T - U(\bar{\mathbf{p}}_T, \bar{\mathbf{q}}_T) \} + E^a \{ U(\bar{\mathbf{p}}_T, \mathbf{q}_T^b) - \bar{U}_T \} \leq \varepsilon \quad (59)$$

where (a) follows since  $U(\bar{\mathbf{p}}_T, \bar{\mathbf{q}}_T) \leq U(\bar{\mathbf{p}}_T, \mathbf{q}_T^b)$ . Equations (58) and (59) show that  $(\bar{\mathbf{p}}_T, \bar{\mathbf{q}}_T)$  is in  $\mathcal{N}_\varepsilon$  in the  $L^1$  sense. Since  $\varepsilon > 0$  is arbitrary, and  $\mathcal{N}_\varepsilon$  is monotonically decreasing to  $\mathcal{N}_0$  as  $\varepsilon \rightarrow 0$ , we conclude that  $(\bar{\mathbf{p}}_T, \bar{\mathbf{q}}_T)$  converges in  $L^1$  to  $\mathcal{N}_0$ , which is the set of NE of the game. By Markov's inequality, it follows that  $(\bar{\mathbf{p}}_T, \bar{\mathbf{q}}_T)$  converges in probability to the set of NE. Since  $U$  is linear,  $U(\bar{\mathbf{p}}_T, \bar{\mathbf{q}}_T)$  converges to the value of the game  $\square$
